# Supplementary material for: DNA adsorbed on hydroxyapatite surfaces
Source: Royal Society of Chemistry journal article supplement (doi:10.1039/c4tb01184h), 2014-08-15
Supplement: c4tb01184h1.pdf [file c4tb01184h1.pdf]

# SUPPORTING INFORMATION

## DNA ADSORBED ON HYDROXYAPATITE SURFACES

**Luis J. del Valle,<sup>1,♦</sup> Oscar Bertran,<sup>2,♦</sup> Gustavo Chaves,<sup>1</sup> Guillermo Revilla-López,<sup>1</sup>**

**Manuel Rivas,<sup>1</sup> María T. Casas,<sup>1</sup> Jordi Casanovas,<sup>3</sup> Pau Turon,<sup>4,\*</sup> Jordi**

**Puiggali,<sup>1,5,\*</sup> and Carlos Alemán<sup>1,5,\*</sup>**

*<sup>1</sup> Departament d'Enginyeria Química, E. T. S. d'Enginyeria Industrial de Barcelona,*

*Universitat Politècnica de Catalunya, Diagonal 647, 08028 Barcelona, Spain*

*<sup>2</sup> Departament de Física Aplicada, EEI, Universitat Politècnica de Catalunya, Pça. Rei*

*15, 08700 Igualada, Spain*

*<sup>3</sup> Departament de Química, Escola Politècnica Superior, Universitat de Lleida, c/*

*Jaume II n° 69, Lleida E-25001, Spain*

*<sup>4</sup> B. Braun Surgical S.A. Carretera de Terrasa 121, 08191 Rubí (Barcelona), Spain*

*<sup>5</sup> Center for Research in Nano-Engineering, Universitat Politècnica de Catalunya,*

*Campus Sud, Edifici C', C/Pasqual i Vila s/n, Barcelona E-08028, Spain*

**Table S1.** Experimental conditions used for the preparation of the different HAp samples.

| <b>Label</b> | <b>HAp particles</b>                    | <b>Conditions</b>                                                                                                                                                                                                                        |
|--------------|-----------------------------------------|------------------------------------------------------------------------------------------------------------------------------------------------------------------------------------------------------------------------------------------|
| <b>HAp1</b>  | Mixed: amorphous sheets and rods        | Commercial: Bio-Gel® HTP Gel purchased from BIO-RAD                                                                                                                                                                                      |
| <b>HAp2</b>  | Sheet crystals: flower-like and laminar | Reagent: Quick addition of 0.3 M $\text{Ca}(\text{NO}_3)_2$ ethanol solution.<br>Reaction: pH = 8.0 and 40°C.<br>Treatments: Hydrothermal conditions and 24 h of aging at room temperature.                                              |
| <b>HAp3</b>  | Nanospheres                             | Reagent: Quick addition of 0.5 M $\text{Ca}(\text{NO}_3)_2$ ethanol solution.<br>Reaction: pH > 11 and room temperature.<br>Treatments: Non-hydrothermal conditions and 24 h of aging at 37 °C.                                          |
| <b>HAp4</b>  | Fusiform rods                           | Reagent: Drop-wise addition of 0.3 M $\text{Ca}(\text{NO}_3)_2$ aqueous solution. Addition of ethanolamine as surfactant.<br>Reaction: pH = 10.0 and 60°C.<br>Treatments: Hydrothermal conditions and 24 h of aging at room temperature. |

**Table S2.** Main infrared absorption bands ( $\text{cm}^{-1}$ ) for HAp particles. Integrated band relative areas are displayed in parenthesis.

|             | $\text{PO}_4^{3-}$ |                                        | $\text{CO}_3^{2-}$       |                              |
|-------------|--------------------|----------------------------------------|--------------------------|------------------------------|
|             | $\nu_1$            | $\nu_3$                                | $\nu_2$                  | $\nu_3$                      |
| <b>HAp1</b> | 957<br>(5.03%)     | 1016,1084<br>(57.93%,19.87%)           | 862<br>(3.73%)           | 1419<br>(13.43%)             |
| <b>HAp2</b> | 994<br>(19.30%)    | 1058,1125<br>(38.79%,22.97%)           | 900<br>(5.15%)           | 1376<br>(13.78%)             |
| <b>HAp3</b> | 954<br>(2.91%)     | 1013,1090<br>(44.16%,10.04%)           | 826,873<br>(1.24%,1.21%) | 1330,1424<br>(23.18%,17.26%) |
| <b>HAp4</b> | 962<br>(5.28%)     | 1022,1059,1089<br>(52.06%,4.22%,17.6%) | 867<br>(3.22%)           | 1346,1433<br>(10.58%,7.03%)  |

**Table S3.** Results obtained from modeling (see Eqn 3) of the protonation ability of HAp particles.

|             | <b>pH (initial)</b> | $y_0$     | $A$       | $\tau$ (mM) | $r^2$  |
|-------------|---------------------|-----------|-----------|-------------|--------|
| <b>HAp1</b> | 7.02                | 5.32±0.05 | 1.55±0.07 | 1.61±0.17   | 0.9726 |
| <b>HAp2</b> | 7.93                | 5.59±0.06 | 2.16±0.07 | 1.75±0.13   | 0.9866 |
| <b>HAp3</b> | 6.78                | 4.89±0.07 | 1.79±0.06 | 3.12±0.28   | 0.9907 |
| <b>HAp4</b> | 7.08                | 3.61±0.09 | 3.20±0.10 | 1.94±0.17   | 0.9852 |
